# Supplementary material for: Translation and Validation of Enhanced Asian Rome III Questionnaires in Bengali Language for Diagnosis of Functional Gastrointestinal Disorders
Source: PubMed Central journal article supplement — J Neurogastroenterol Motil. 2016 Apr 30;22(2):240–7. doi: 10.5056/jnm15129 (PMC4819862; doi:10.5056/jnm15129), 2016-04-30
Supplement: JNM-22-240-suppl.pdf [file JNM-22-240-suppl.pdf]

তারিখঃ-----/-----/-----

পরিচিতি নং-----

দিন মাস বছর

|                                                                                             |                                                                                                                                         |                         |
|---------------------------------------------------------------------------------------------|-----------------------------------------------------------------------------------------------------------------------------------------|-------------------------|
| ১। গত তিন মাসে কত ঘন ঘন আপনি গলায় চাকা, ভরা ভরা লাগা বা গলায় কিছু আটকে থাকা অনুভব করেছেন? | ০. কখনও নয়→→→→<br>১. মাসে একদিনের কম<br>২. মাসে একদিন<br>৩. মাসে ২-৩ দিন<br>৪. সপ্তাহে একদিন<br>৫. সপ্তাহে একদিনের বেশী<br>৬. প্রতিদিন | সরাসরি ৪ নং প্রশ্নে যান |
| ২। এই অনুভূতি কি ৬ মাস বা তার বেশী সময়ের?                                                  | ০. না<br>১. হ্যাঁ                                                                                                                       |                         |
| ৩। এই অনুভূতি কি দুটি আহারের মাঝখানে ঘটে?<br>(যখন আপনি খাচ্ছেন না)                          | ০. না<br>১. হ্যাঁ                                                                                                                       |                         |
| ক) আহারের সাথে এই অনুভূতির কোন সম্পর্ক আছে কি?                                              | ০. না<br>১. খাবার আগে<br>২. খাবার সময়<br>৩. খাবারের পর                                                                                 |                         |
| খ) এই অনুভূতি সাধারণত কতটা তীব্র ছিল?                                                       | ১. খুব হালকা<br>২. হালকা<br>৩. মাঝামাঝি<br>৪. তীব্র<br>৫. খুব তীব্র                                                                     |                         |
| ৪। খাবার অথবা পান করার সময় কি গিলতে ব্যাথা লাগে?                                           | ০. কখনও নয়/কদাচিৎ<br>১. কখনো কখনো<br>২. প্রায়ই<br>৩. অধিকাংশ সময়<br>৪. সব সময়                                                       |                         |
| ক) খাবার অথবা পান করার সময় গিলতে কোন অসুবিধা অনুভূত হয় কি না?                             | ০. কখনও নয়/কদাচিৎ<br>১. কখনো কখনো<br>২. প্রায়ই<br>৩. অধিকাংশ সময়<br>৪. সব সময়                                                       |                         |
| ৫। গত তিন মাসে বুকের মাঝখানে ব্যাথা বা অস্বস্থি কত ঘন ঘন হয়েছিল?(হৃদরোগ সম্পর্কিত নয়)     | ০. কখনও নয়→→→→<br>১. মাসে একদিনের কম<br>২. মাসে একদিন<br>৩. মাসে ২-৩ দিন<br>৪. সপ্তাহে একদিন<br>৫. সপ্তাহে একদিনের বেশী<br>৬. প্রতিদিন | সরাসরি ৮ নং প্রশ্নে যান |
| ৬। আপনার এই বুকে ব্যাথা কি ৬ মাস বা তার চেয়ে বেশী সময় ধরে আছে?                            | ০. না<br>১. হ্যাঁ                                                                                                                       |                         |
| ৭। যখন বুকে ব্যাথা হয় কত ঘন ঘন তা জ্বালা পোড়ার মত অনুভূত হয়?                             | ০. কখনও নয়/কদাচিৎ<br>১. কখনো কখনো<br>২. প্রায়<br>৩. অধিকাংশ সময়<br>৪. সব সময়                                                        |                         |

|                                                                                                    |                                                                                                                                         |                          |
|----------------------------------------------------------------------------------------------------|-----------------------------------------------------------------------------------------------------------------------------------------|--------------------------|
| ৮। গত তিন মাসে কত ঘন ঘন বুক জ্বালা হয়েছিল?<br>(বুকে জ্বালাময় অস্বস্থি বা জ্বালাময় ব্যাথা)       | ০. কখনও নয়→→→→<br>১. মাসে একদিনের কম<br>২. মাসে একদিন<br>৩. মাসে ২-৩ দিন<br>৪. সপ্তাহে একদিন<br>৫. সপ্তাহে একদিনের বেশী<br>৬. প্রতিদিন | সরাসরি ১০ নং প্রশ্নে যান |
| ৯। এই বুক জ্বালা কি ৬ মাস বা তার বেশী সময় ধরে<br>আছে?                                             | ০. না<br>১. হ্যাঁ                                                                                                                       |                          |
| ১০। গত তিন মাসে কত ঘন ঘন খাবার বা তরল<br>গিলার সময় আটকে গেছে বা ধীর গতিতে বুক দিয়ে<br>নেমে গেছে? | ০. কখনও নয়→→→→<br>১. মাসে একদিনের কম<br>২. মাসে একদিন<br>৩. মাসে ২-৩ দিন<br>৪. সপ্তাহে একদিন<br>৫. সপ্তাহে একদিনের বেশী<br>৬. প্রতিদিন | সরাসরি ১৩নং প্রশ্নে যান  |
| ১১। খাবার আটকে যাওয়ার এই লক্ষণ কি বুক জ্বালার<br>সাথে জড়িত ছিল?                                  | ০. কখনও না বা কদাচিৎ<br>১. কখনও কখনও<br>২. প্রায়ই<br>৩. বেশীর ভাগ সময়<br>৪. সব সময়<br>৫. উত্তর দেওয়া কঠিন                           |                          |
| ১২। আপনার কি এই অসুবিধা ৬ মাস বা তার বেশী<br>সময় ধরে আছে?                                         | ০. না<br>১. হ্যাঁ                                                                                                                       |                          |
| ১৩। গত তিন মাসে কত ঘন ঘন নিয়মিত পরিমাণ<br>খাবারের পর অস্বস্থিকর ভরা ভাব অনুভব করেছেন?             | ০. কখনও নয়→→→→<br>১. মাসে একদিনের কম<br>২. মাসে একদিন<br>৩. মাসে ২-৩ দিন<br>৪. সপ্তাহে একদিন<br>৫. সপ্তাহে একদিনের বেশী<br>৬. প্রতিদিন | সরাসরি ১৫ নং প্রশ্নে যান |
| ১৪। এই অস্বস্থিকর ভরা অনুভূতি কি ছয় মাস বা তার<br>অধিক সময় ধরে আছে?                              | ০. না<br>১. হ্যাঁ                                                                                                                       |                          |
| ক) এই পেট ভরা ভাব কি আহারের পরিমানের সাথে<br>সম্পর্কিত?                                            | ০. না<br>১. বেশী পরিমানে খাবার<br>২. প্রাত্যহিক খাবার<br>৩. কম পরিমানে খাবার                                                            |                          |
| খ) সাধারণত: পেটের কোথায় এই পেট ভরা ভাব<br>অনুভূত হয়?                                             | ১. পেটের উপরের দিকে<br>২. তল পেটে<br>৩. নাভীর চার পাশে<br>৪. সারা পেটজুড়ে<br>৫. বুকে                                                   |                          |

|                                                                                                                                                                                            |                                                                                                                                                                                                                                   |                                                                                       |
|--------------------------------------------------------------------------------------------------------------------------------------------------------------------------------------------|-----------------------------------------------------------------------------------------------------------------------------------------------------------------------------------------------------------------------------------|---------------------------------------------------------------------------------------|
| <p>গ) এই অস্বস্থিকর ভরা ভাব কোথায় অনুভব করেন ডান পাশের চিত্রে নির্দেশ করুন । যদি আপনি একের অধিক জায়গায় অস্বস্থিকর ভরাভাব অনুভব করেন তাহলে সবচেয়ে অস্বস্থিকর স্থানটি নির্দেশ করুন ।</p> |                                                                                                                                                                                                                                   | 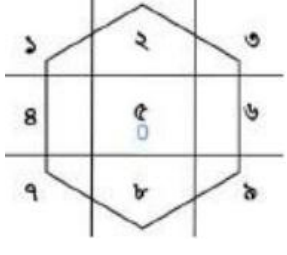   |
| <p>ঘ) এই পেট ভরা অনুভূতি কিভাবে সবচেয়ে লাঘব হয়?</p>                                                                                                                                      | <ol style="list-style-type: none"> <li>১. পায়খানা করে</li> <li>২. বায়ু বের করে</li> <li>৩. দুটোতেই</li> <li>৪. কোন ভাবেই নয়</li> <li>৫. ঢেকুর তুলে</li> </ol>                                                                  |                                                                                       |
| <p>ঙ) আপনার পেট ভরা অনুভূতির তীব্রতাকে কিভাবে সংজ্ঞায়িত করবেন?</p>                                                                                                                        | <ol style="list-style-type: none"> <li>০. খুবই মৃদু</li> <li>১. মৃদু</li> <li>২. মাঝারী</li> <li>৩. তীব্র</li> <li>৪. অতি তীব্র</li> </ol>                                                                                        |                                                                                       |
| <p>চ) পেটে ভরা অনুভূতির সময় কি আপনাকে দৌড়ে পায়খানায় যেতে হয়?</p>                                                                                                                      | <ol style="list-style-type: none"> <li>০. না</li> <li>১. হ্যাঁ</li> </ol>                                                                                                                                                         |                                                                                       |
| <p>১৫। গত তিন মাসে আপনি কতবার স্বাভাবিক খাবার শেষ করতে পারেননি?</p>                                                                                                                        | <ol style="list-style-type: none"> <li>০. কখনও নয় → → → →</li> <li>১. মাসে একদিনের কম</li> <li>২. মাসে একদিন</li> <li>৩. মাসে ২-৩ দিন</li> <li>৪. সপ্তাহে একদিন</li> <li>৫. সপ্তাহে একদিনের বেশী</li> <li>৬. প্রতিদিন</li> </ol> | <p>সরাসরি ১৭ নং প্রশ্নে যান</p>                                                       |
| <p>১৬। আপনার এই স্বাভাবিক পরিমাণ খাবার খেতে না পারা কি ছয় মাস বা তার অধিক সময়ে ধরে আছে? (আপনি কি গত ছয় মাস বা তার অধিক সময় ধরে স্বাভাবিক পরিমাণ খাবার শেষ করতে পারছেন না?)</p>         | <ol style="list-style-type: none"> <li>০. না</li> <li>১. হ্যাঁ</li> </ol>                                                                                                                                                         |                                                                                       |
| <p>১৭। গত তিন মাসে কত ঘন ঘন আপনি পেটের মাঝখানে বা নাভির উপরে কিষ্ট বুকো নয়, ব্যাথা বা জ্বালা অনুভব করেছেন?</p>                                                                            | <ol style="list-style-type: none"> <li>০. কখনও নয় → → → →</li> <li>১. মাসে একদিনের কম</li> <li>২. মাসে একদিন</li> <li>৩. মাসে ২-৩ দিন</li> <li>৪. সপ্তাহে একদিন</li> <li>৫. সপ্তাহে একদিনের বেশী</li> <li>৬. প্রতিদিন</li> </ol> | <p>সরাসরি ২৬ নং প্রশ্নে যান</p>                                                       |
| <p>ক) আপনার ব্যাথা অথবা জ্বালার অবস্থান ডান পাশের চিত্রে নির্দেশ করুন । যদি আপনি একের অধিক জায়গায় ব্যাথা অথবা জ্বালা অনুভব করেন তাহলে সবচেয়ে অস্বস্থিকর স্থানটি নির্দেশ করুন ।</p>      |                                                                                                                                                                                                                                   |  |
| <p>খ) আপনি অনুভব করেছেন</p>                                                                                                                                                                | <ol style="list-style-type: none"> <li>১. শুধু ব্যাথা</li> <li>২. শুধু জ্বালা</li> <li>৩. ব্যাথা ও জ্বালা</li> </ol>                                                                                                              |                                                                                       |

|                                                                                                    |                                                                                                |                          |
|----------------------------------------------------------------------------------------------------|------------------------------------------------------------------------------------------------|--------------------------|
|                                                                                                    |                                                                                                |                          |
| ১৮। আপনার এই ব্যাথা বা জ্বালা কি ছয় মাস বা তার অধিক সময় ধরে আছে?                                 | ০. না<br>১. হ্যাঁ                                                                              |                          |
| ১৯। এই ব্যাথা বা জ্বালা শুরু হয়ে কি একই দিনে পুরোপুরি সেরে যায়?                                  | ০. কখনও না/কদাচিৎ<br>১. কখনও কখনও<br>২. প্রায়ই<br>৩. বেশীর ভাগ সময়<br>৪. সব সময়ে            |                          |
| ২০। সাধারণত আপনার পেটের মাঝখানে / নাভীর উপরে এই ব্যাথা বা জ্বালার তীব্রতা কেমন ছিল?                | ১. খুবই মৃদু<br>২. মৃদু<br>৩. মাঝারী<br>৪. তীব্র<br>৫. অতি তীব্র                               |                          |
| ২১। এই ব্যাথা বা জ্বালা কি আহারের সাথে পরিবর্তিত হয়?                                              | ০. খাবারের পর পরিবর্তন হয় না।<br>১. খাবার পর ব্যাথা বেড়ে যায়<br>২. খাবার পর ব্যাথা কমে যায় |                          |
| ২২। এই জ্বালা বা ব্যাথা কি এন্টাসিড গ্রহনে উপশম হয়?                                               | ০. কখনও নয় বা কদাচিৎ<br>১. কখনও কখনও<br>২. প্রায়ই<br>৩. অধিকাংশ সময়<br>৪. সব সময়           |                          |
| ২৩। এই ব্যাথা বা জ্বালা পায়খানা হলে বা বায়ু নির্গত হলে সাধারণত কি কমে যেত বা ভাল হয়ে যেত?       | ০. কখনও না বা কদাচিৎ<br>১. কখন ও কখনও<br>২. প্রায়ই<br>৩. বেশীর ভাগ সময়<br>৪. সব সময়         |                          |
| ক) মল ত্যাগ বা বায়ু ত্যাগের পর এ ব্যাথা বা জ্বালা কমে আসে?                                        | ০. না<br>১. মলত্যাগের পর<br>২. বায়ু ত্যাগের পর<br>৩. উভয়ই                                    |                          |
| খ) মলত্যাগ বা বায়ু ত্যাগের পর এ ব্যাথা বা জ্বালা বেড়ে যায়?                                      | ০. না<br>১. মলত্যাগের পর<br>২. বায়ু ত্যাগের পর<br>৩. উভয়ই                                    |                          |
| ২৪। যখন ব্যাথা বা জ্বালা শুরু হয় তখন সাধারণত মল ত্যাগের সংখ্যার কোন পরিবর্তন হয় কি? (কম বা বেশী) | ০. কখনও না বা কদাচিৎ<br>১. কখনও কখনও<br>২. প্রায়ই<br>৩. বেশীর ভাগ সময়<br>৪. সব সময়          |                          |
| ২৫। এই ব্যাথা বা জ্বালার সাথে মল কি অধিক নরম বা কঠিনতর হয়?                                        | ০. কখনও নয় বা কদাচিৎ<br>১. কখনও কখনও<br>২. প্রায়ই<br>৩. বেশীর ভাগ সময়<br>৪. সব সময়         |                          |
| ২৬। গত তিন মাসে আপনি কত ঘন ঘন বিরজিকর বমি ভাব অনুভব করেছেন?                                        | ০. কখনও নয় → → → →<br>১. মাসে একদিনের কম<br>২. মাসে একদিন                                     | সরাসরি ২৮ নং প্রশ্নে যান |

|                                                                                   |                                                                                                                                                                                                                                   |                          |
|-----------------------------------------------------------------------------------|-----------------------------------------------------------------------------------------------------------------------------------------------------------------------------------------------------------------------------------|--------------------------|
|                                                                                   | <ul style="list-style-type: none"> <li>৩. মাসে ২-৩ দিন</li> <li>৪. সপ্তাহে একদিন</li> <li>৫. সপ্তাহে একদিনের বেশী</li> <li>৬. প্রতিদিন</li> </ul>                                                                                 |                          |
| ২৭। এই বমি ভাব কি ৬ মাসের বেশী সময় পূর্বে শুরু হয়েছিল?                          | <ul style="list-style-type: none"> <li>০. না</li> <li>১. হ্যাঁ</li> </ul>                                                                                                                                                         |                          |
| ২৮। গত তিন মাসে আপনি কত ঘন ঘন বমি করেছেন?                                         | <ul style="list-style-type: none"> <li>০. কখনও নয় → → → →</li> <li>১. মাসে একদিনের কম</li> <li>২. মাসে একদিন</li> <li>৩. মাসে ২-৩ দিন</li> <li>৪. সপ্তাহে একদিন</li> <li>৫. সপ্তাহে একদিনের বেশী</li> <li>৬. প্রতিদিন</li> </ul> | সরাসরি ৩৩ নং প্রশ্নে যান |
| ২৯। আপনার এই বমি কি ছয় মাস বা তার অধিক সময় ধরে আছে?                             | <ul style="list-style-type: none"> <li>০. না</li> <li>১. হ্যাঁ</li> </ul>                                                                                                                                                         |                          |
| ৩০। আপনি কি নিজ চেষ্টায় বমি করছেন?                                               | <ul style="list-style-type: none"> <li>০. কখনও নয় বা কদাচিৎ</li> <li>১. কখনও কখনও</li> <li>২. প্রায়ই</li> <li>৩. বেশীর ভাগ সময়</li> <li>৪. সব সময়</li> </ul>                                                                  |                          |
| ৩১। আপনার গত বছরে কি আলাদাভাবে কিছু দিনের জন্য বমি হয়ে হয়ে আবার বন্ধ হয়ে গেছে? | <ul style="list-style-type: none"> <li>০. কখনও নয় বা কদাচিৎ → → → →</li> <li>১. কখনও কখনও</li> <li>২. প্রায়ই</li> <li>৩. বেশীর ভাগ সময়</li> <li>৪. সব সময়</li> </ul>                                                          | সরাসরি ৩৩ নং প্রশ্নে যান |
| ৩২। গত বছরে অন্তত: তিন বার এরকম হয়েছিল?                                          | <ul style="list-style-type: none"> <li>০. না</li> <li>১. হ্যাঁ</li> </ul>                                                                                                                                                         |                          |
| ৩৩। গত তিন মাসে কত ঘন ঘন আপনার মুখের মধ্যে খাবার উঠে আসত?                         | <ul style="list-style-type: none"> <li>০. কখনও নয় → → → →</li> <li>১. মাসে একদিনের কম</li> <li>২. মাসে একদিন</li> <li>৩. মাসে ২-৩ দিন</li> <li>৪. সপ্তাহে একদিন</li> <li>৫. সপ্তাহে একদিনের বেশী</li> <li>৬. প্রতিদিন</li> </ul> | সরাসরি ৩৯ নং প্রশ্নে যান |
| ৩৪। এই সমস্যা (খাবার মুখের মধ্যে উঠে আসা) কি ছয় মাস বা অধিক সময় ধরে আছে?        | <ul style="list-style-type: none"> <li>০. না</li> <li>১. হ্যাঁ</li> </ul>                                                                                                                                                         |                          |
| ৩৫। মুখে উঠে আসা খাবার গিলে ফেলা বা ফেলে দেয়ার আগে মুখে কিছুক্ষন থাকত কিনা?      | <ul style="list-style-type: none"> <li>০. কখনও নয় বা কদাচিৎ</li> <li>১. কখনও কখনও</li> <li>২. প্রায়ই</li> <li>৩. বেশীর ভাগ সময়</li> <li>৪. সব সময়</li> </ul>                                                                  |                          |
| ৩৬। খাবার মুখে উঠে আসার আগে ওয়াক তুলতেন কিনা?                                    | <ul style="list-style-type: none"> <li>০. কখনও নয় বা কদাচিৎ</li> <li>১. কখনও কখনও</li> <li>২. প্রায়ই</li> <li>৩. বেশীর ভাগ সময়</li> <li>৪. সব সময়</li> </ul>                                                                  |                          |

|                                                                                       |                                                                                                                                             |                          |
|---------------------------------------------------------------------------------------|---------------------------------------------------------------------------------------------------------------------------------------------|--------------------------|
| ৩৭। খাবার মুখে উঠে আসলে কত ঘন ঘন বমি করতেন বা পেটে অসুস্থ বোধ হত?                     | ০. কখনও নয় বা কদাচিৎ<br>১. কখনও কখনও<br>২. প্রায়ই<br>৩. বেশীর ভাগ সময়<br>৪. সব সময়                                                      |                          |
| ৩৮। যখন খাবার টক বা অল্পস্বাদযুক্ত হয়ে যেত তখন কি মুখের মধ্যে উঠে আসা বন্ধ হয়ে যেত? | ০. কখনও নয় বা কদাচিৎ<br>১. কখনও কখনও<br>২. প্রায়ই<br>৩. বেশীর ভাগ সময়<br>৪. সব সময়                                                      |                          |
| ৩৯। গত তিন মাসে আপনার কত ঘন ঘন কষ্টদায়ক ঢেকুর হয়েছে?                                | ০. কখনও নয় → → → →<br>১. মাসে একদিনের কম<br>২. মাসে একদিন<br>৩. মাসে ২-৩ দিন<br>৪. সপ্তাহে একদিন<br>৫. সপ্তাহে একদিনের বেশী<br>৬. প্রতিদিন | সরাসরি ৪১ নং প্রশ্নে যান |
| ৪০। এই বিরক্তিকর ঢেকুর কি ছয় মাস আগে শুরু হয়েছিল?                                   | ০. না<br>১. হ্যাঁ                                                                                                                           |                          |
| ক) আপনার কি খাবারের আগে ঢেকুর হত?                                                     | ০. না<br>১. হ্যাঁ                                                                                                                           |                          |
| খ) আপনার কি খাবার সময় ঢেকুর হত ?                                                     | ০. না<br>১. হ্যাঁ                                                                                                                           |                          |
| গ) আপনার কি খাবারের পরে ঢেকুর হত?                                                     | ০. না<br>১. হ্যাঁ                                                                                                                           |                          |
| ঘ) ঢেকুরের সাথে খাবারের কি কোন সম্পর্ক ছিল?                                           | ০. না<br>১. হ্যাঁ                                                                                                                           |                          |
| ঙ) সাধারণত এই ঢেকুরের তীব্রতা কিরূপ ছিল?                                              | ১. খুবই মৃদু<br>২. মৃদু<br>৩. মাঝারী<br>৪. তীব্র<br>৫. অতিতীব্র                                                                             |                          |
| চ) ঢেকুর কি কমে যায়                                                                  | ১. মলত্যাগের পর<br>২. বায়ু ত্যাগের পর<br>৩. আহারের পর                                                                                      |                          |
| ছ) এই ঢেকুরের সাথে একই সময়ে আর কি হত?                                                | ১. পেট ফাঁপা<br>২. পেটে ব্যথা<br>৩. বুক জ্বালা<br>৪. মুখে খাবার উঠে আসা<br>৫. তরল মুখে উঠে আসা                                              |                          |
| জ) ঢেকুর পুরোপরি চলে যায়                                                             | ১. আহারের পর<br>২. বায়ু ত্যাগের পর<br>৩. মলত্যাগের পর<br>৪. এন্টাসিট অথবা অন্যান্য ঔষধ<br>৫. উপরের কোনটাই না                               |                          |
| ৪১। গত তিন মাসে কত ঘন ঘন আপনার পেটের যে                                               | ০. কখনও নয় → → → →                                                                                                                         | সরাসরি ৫২ নং প্রশ্নে যান |

|                                                                                                                                                                                                    |                                                                                                                                                                                                      |                                                                                                |
|----------------------------------------------------------------------------------------------------------------------------------------------------------------------------------------------------|------------------------------------------------------------------------------------------------------------------------------------------------------------------------------------------------------|------------------------------------------------------------------------------------------------|
| <p>কোন স্থানে অস্বস্থি বা ব্যাথা হয়েছিল?</p> <p>(ক) আপনার ব্যাথার স্থানটি পাশের চিত্রে নির্দেশ করুন। যদি আপনার একের অধিক স্থানে ব্যাথা থাকে তাহলে সবচেয়ে তীব্র ব্যাথার স্থানটি নির্দেশ করুন।</p> | <ol style="list-style-type: none"> <li>১. মাসে একদিনের কম</li> <li>২. মাসে একদিন</li> <li>৩. মাসে ২-৩ দিন</li> <li>৪. সপ্তাহে একদিন</li> <li>৫. সপ্তাহে একদিনের বেশী</li> <li>৬. প্রতিদিন</li> </ol> | <p>(ক)</p> 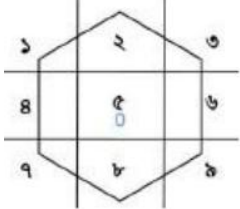 |
| <p>৪২। আপনার কি শুধুমাত্র ব্যাথা ছিল (অস্বস্থি বা ব্যাথা ও অস্বস্থিকর মিশ্রন নয়)?</p>                                                                                                             | <ol style="list-style-type: none"> <li>০. কখনও নয় বা কদাচিৎ</li> <li>১. কখনও কখনও</li> <li>২. প্রায়ই</li> <li>৩. বেশীর ভাগ সময়</li> <li>৪. সব সময়</li> </ol>                                     |                                                                                                |
| <p>ক) আপনার কি?</p>                                                                                                                                                                                | <ol style="list-style-type: none"> <li>১. শুধু ব্যাথা</li> <li>২. শুধু অস্বস্থি</li> <li>৩. ব্যাথা এবং অস্বস্থি</li> </ol>                                                                           |                                                                                                |
| <p>৪৩। মহিলাদের জন্য এ অস্বস্থি বা ব্যাথা কি শুধুমাত্র মাসিক চলাকালীন সময়ে হতো, অন্য সময়ে নয়?</p>                                                                                               | <ol style="list-style-type: none"> <li>০. না</li> <li>১. হ্যাঁ</li> <li>২. প্রয়োজ্য নয়, কেননা মাসিক বন্ধ অথবা আমি একজন পুরুষ</li> </ol>                                                            |                                                                                                |
| <p>৪৪। যখন ব্যাথা হতো তখন আপনার দৈনন্দিন কাজকর্ম কি রকম ব্যাঘাত বা বিঘ্ন ঘটত? (যেমন গৃহস্থালী কাজ, সামাজিক আনুষ্ঠানাদি)</p>                                                                        | <ol style="list-style-type: none"> <li>০. কখনও নয় বা কদাচিৎ</li> <li>১. মাঝে মাঝে</li> <li>২. প্রায়ই</li> <li>৩. বেশীর ভাগ সময়</li> <li>৪. সব সময়</li> </ol>                                     |                                                                                                |
| <p>৪৫। এই অস্বস্থি বা ব্যাথা কি ৬ মাস বা তার অধিক সময় ধরে আছে?</p>                                                                                                                                | <ol style="list-style-type: none"> <li>০. না</li> <li>১. হ্যাঁ</li> </ol>                                                                                                                            |                                                                                                |
| <p>৪৬। মল ত্যাগের পর এই অস্বস্থি বা ব্যাথা ভালো হয়েছে বা থেমে গেছে, এরকম কত বার হয়েছে?</p>                                                                                                       | <ol style="list-style-type: none"> <li>০. কখনও নয় বা কদাচিৎ</li> <li>১. মাঝে মাঝে</li> <li>২. প্রায়ই</li> <li>৩. বেশীর ভাগ সময়</li> <li>৪. সব সময়</li> </ol>                                     |                                                                                                |
| <p>ক) মলত্যাগের পর আপনার এই অস্বস্থি বা ব্যাথা কতটা কমত?</p>                                                                                                                                       | <ol style="list-style-type: none"> <li>০. কখনও নয় বা কদাচিৎ</li> <li>১. মাঝে মাঝে</li> <li>২. প্রায়ই</li> <li>৩. বেশীর ভাগ সময়</li> <li>৪. সব সময়</li> </ol>                                     |                                                                                                |
| <p>৪৭। যখন এই অস্বস্থি বা ব্যাথা শুরু হত তখন কি আপনার বার বার পায়খানার বেগ হতো?</p>                                                                                                               | <ol style="list-style-type: none"> <li>০. কখনও নয় বা কদাচিৎ</li> <li>১. মাঝে মাঝে</li> <li>২. প্রায়ই</li> <li>৩. বেশীর ভাগ সময়</li> <li>৪. সব সময়</li> </ol>                                     |                                                                                                |
| <p>৪৮। যখন এই অস্বস্থি বা ব্যাথা শুরু হত তখন কি আপনার পায়খানার মাত্রা কমে যেত?</p>                                                                                                                | <ol style="list-style-type: none"> <li>০. কখনও নয় বা কদাচিৎ</li> <li>১. মাঝে মাঝে</li> <li>২. প্রায়ই</li> </ol>                                                                                    |                                                                                                |

|                                                                                                                                                                          |                                                                                                                                                                                                                 |  |
|--------------------------------------------------------------------------------------------------------------------------------------------------------------------------|-----------------------------------------------------------------------------------------------------------------------------------------------------------------------------------------------------------------|--|
|                                                                                                                                                                          | <ul style="list-style-type: none"> <li>৩. বেশীর ভাগ সময়</li> <li>৪. সব সময়</li> </ul>                                                                                                                         |  |
| ৪৯। যখন অস্বস্থি বা ব্যাথা হত তখন কি আপনার পায়খানা নরম হতো?                                                                                                             | <ul style="list-style-type: none"> <li>০. কখনও নয় বা কদাচিৎ</li> <li>১. মাঝে মাঝে</li> <li>২. প্রায়ই</li> <li>৩. বেশীর ভাগ সময়</li> <li>৪. সব সময়</li> </ul>                                                |  |
| ৫০। যখন এই অস্বস্থি বা ব্যাথা শুরু হতো, তখন আপনার পায়খানা কি শক্ত হতো?                                                                                                  | <ul style="list-style-type: none"> <li>০. কখনও নয় বা কদাচিৎ</li> <li>১. মাঝে মাঝে</li> <li>২. প্রায়ই</li> <li>৩. বেশীর ভাগ সময়</li> <li>৪. সব সময়</li> </ul>                                                |  |
| ৫১। কত ঘন ঘন আপনার এই ব্যাথা বা অস্বস্থি নড়াচড়া বা শরীরের অবস্থান পরিবর্তনের দ্বারা কমে যেত?<br>* পরবর্তী ৫২ নং প্রশ্নের উত্তর দেওয়ার আগে ৫ মিনিট বিশ্রাম নিতে পারেন। | <ul style="list-style-type: none"> <li>০. কখনও নয় বা কদাচিৎ</li> <li>১. মাঝে মাঝে</li> <li>২. প্রায়ই</li> <li>৩. বেশীর ভাগ সময়</li> <li>৪. সব সময়</li> </ul>                                                |  |
| ৫২। গত তিন মাসে কত ঘন ঘন আপনার সপ্তাহে তিন বারের কম (০-২) পায়খানা হয়েছে?                                                                                               | <ul style="list-style-type: none"> <li>০. কখনও নয় বা কদাচিৎ</li> <li>১. মাঝে মাঝে</li> <li>২. প্রায়ই</li> <li>৩. বেশীর ভাগ সময়</li> <li>৪. সব সময়</li> <li>৫. মনে করা অথবা সিদ্ধান্ত নেওয়া কঠিন</li> </ul> |  |
| ৫৩। গত তিন মাসে কত ঘন ঘন আপনার শক্ত বা বড়ি বড়ি পায়খানা হয়েছে?                                                                                                        | <ul style="list-style-type: none"> <li>০. কখনও নয় বা কদাচিৎ</li> <li>১. মাঝে মাঝে</li> <li>২. প্রায়ই</li> <li>৩. বেশীর ভাগ সময়</li> <li>৪. সব সময়</li> </ul>                                                |  |
| ৫৪। গত তিন মাসে কত ঘন ঘন আপনাকে কোৎ দিয়ে পায়খানা করতে হয়েছে?                                                                                                          | <ul style="list-style-type: none"> <li>০. কখনও নয় বা কদাচিৎ</li> <li>১. মাঝে মাঝে</li> <li>২. প্রায়ই</li> <li>৩. বেশীর ভাগ সময়</li> <li>৪. সব সময়</li> </ul>                                                |  |
| ৫৫। গত তিন মাসে কত ঘন ঘন পায়খানা করার পর আপনার মনে হয়েছে পায়খানা পরিষ্কার হয়নি?                                                                                      | <ul style="list-style-type: none"> <li>০. কখনও নয় বা কদাচিৎ</li> <li>১. মাঝে মাঝে</li> <li>২. প্রায়ই</li> <li>৩. বেশীর ভাগ সময়</li> <li>৪. সব সময়</li> </ul>                                                |  |
| ৫৬। গত তিন মাসে কত ঘন ঘন মল ত্যাগের সময় মল বের হচ্ছেনা (আটকে গেছে) এরূপ অনুভূত হয়েছে?                                                                                  | <ul style="list-style-type: none"> <li>০. কখনও নয় বা কদাচিৎ</li> <li>১. মাঝে মাঝে</li> <li>২. প্রায়ই</li> <li>৩. বেশীর ভাগ সময়</li> <li>৪. সব সময়</li> </ul>                                                |  |
| ক) আপনার মল ত্যাগে কষ্টের কারন কি মনে হয়?                                                                                                                               | <ul style="list-style-type: none"> <li>১. অতি বড়</li> <li>২. অতি পাতলা</li> <li>৩. অতি শক্ত</li> </ul>                                                                                                         |  |



|                                                                                                                             |                                                                                                                     |  |
|-----------------------------------------------------------------------------------------------------------------------------|---------------------------------------------------------------------------------------------------------------------|--|
|                                                                                                                             | ৪. অতি শুকনো<br>৫. উপরের কোনটাই নয়                                                                                 |  |
| খ) আপনার মলত্যাগে কষ্ট হতো কারণ?                                                                                            | ১. মলত্যাগের ইচ্ছে হত না<br>২. দুর্বল চাপ প্রয়োগ<br>৩. চাপ দিলে তা আটকে যেত                                        |  |
| ৫৭। গত তিন মাসে কত ঘন ঘন মলত্যাগ পুরোপুরি সম্পন্ন করার জন্য মলদ্বারে বা এর চারপাশে চাপ দিতে হয়েছিল বা মল বের করতে হয়েছিল? | ০. কখনও নয় বা কদাচিৎ<br>১. মাঝে মাঝে<br>২. প্রায়ই<br>৩. বেশীর ভাগ সময়<br>৪. সব সময়                              |  |
| ক) গত তিন মাসে মল বের করার জন্য নীচের কোনটি করতে হয়েছিল?                                                                   |                                                                                                                     |  |
| I) আঙ্গুল প্রবেশ করানো?                                                                                                     | i) ০.না<br>১.হ্যাঁ                                                                                                  |  |
| II) জল দিয়ে ধৌত করা                                                                                                        | ii) ০.না<br>১. হ্যাঁ                                                                                                |  |
| III) সাপোজিটরী প্রবেশ করানো?                                                                                                | ০.না<br>১. হ্যাঁ                                                                                                    |  |
| IV) ডুস দেওয়া?                                                                                                             | ০.না ১.হ্যাঁ                                                                                                        |  |
| ৫৮। গত তিন মাসে কত ঘন ঘন মলত্যাগের সময় মল অনায়সে বের করতে আপনার কষ্ট হয়েছে?                                              | ০. কখনও নয় বা কদাচিৎ<br>১. মাঝে মাঝে<br>২. প্রায়ই<br>৩. বেশীর ভাগ সময়<br>৪. সব সময়                              |  |
| ৫৯। ৫২-৫৮ নং প্রশ্নে উল্লেখিত কোষ্ঠকাঠিন্যের কোন লক্ষণ কি ছয় মাস আগেই শুরু হয়েছিল?                                        | ০. না<br>১. হ্যাঁ                                                                                                   |  |
| ৬০। গত তিন মাসে কত ঘন ঘন আপনি দিনে ৪ বা ততোধিক বার পায়খানা করেছেন?                                                         | ০. কখনও নয় বা কদাচিৎ<br>১. মাঝে মাঝে<br>২. প্রায়ই<br>৩. বেশীর ভাগ সময়<br>৪. সব সময়<br>৫. উত্তর দেওয়া কষ্টসাধ্য |  |
| ৬১। গত তিন মাসে কত ঘন ঘন আপনি তরল বা পাতলা পায়খানা করেছেন?                                                                 | ০. কখনও নয় বা কদাচিৎ<br>১. মাঝে মাঝে<br>২. প্রায়ই<br>৩. বেশীর ভাগ সময়<br>৪. সব সময়                              |  |
| ৬২। গত তিন মাসে আপনার তিন চতুর্থাংশ মল কি তরল বা পাতলা ছিল?                                                                 | ০. না<br>১. হ্যাঁ<br>২. সিদ্ধান্ত নেয়া কঠিন                                                                        |  |
| *পরবর্তী ৬২ (ক) থেকে ৬২ (ছ) প্রশ্নের উত্তর সবাইকে দিতে হবে।<br>ক) আপনার মলত্যাগের অভ্যাস সম্পর্কে আপনার অভিমত কি?           | ১. শক্ত কঠিন<br>২. তরল পাতলা<br>৩. কখনও কঠিন এবং কখনও পাতলা<br>৪. উপরের কোনটাই না                                   |  |

|                                                                                                                                                                                                                                                                                                                                                       |                                                                                                                                                     |                                                                                                                                                                                                                                                                                                                                                                                                             |
|-------------------------------------------------------------------------------------------------------------------------------------------------------------------------------------------------------------------------------------------------------------------------------------------------------------------------------------------------------|-----------------------------------------------------------------------------------------------------------------------------------------------------|-------------------------------------------------------------------------------------------------------------------------------------------------------------------------------------------------------------------------------------------------------------------------------------------------------------------------------------------------------------------------------------------------------------|
| খ) প্রতি সপ্তাহে আপনার মল ত্যাগের গড় সংখ্যা কত?                                                                                                                                                                                                                                                                                                      | প্রতি সপ্তাহে----বার                                                                                                                                |                                                                                                                                                                                                                                                                                                                                                                                                             |
| *গ) আপনার মলের ধরন নির্ধারণ করুন - যখন আপনি ভাল থাকেন<br>*ঘ) আপনার মলের ধরন নির্ধারণ করুন - কোষ্ঠকাঠিন্য হলে<br>*ঙ) আপনার মলের ধরন নির্ধারণ করুন - ডায়রিয়া হলে<br>*চ) আপনার মলের ধরন নির্ধারণ করুন - বেশীর ভাগ সময়<br>*ছ) আপনার মলের ধরন নির্ধারণ করুন - সবচেয়ে খারাপ অবস্থায়<br>* পাশের ছবির সাথে মিলিয়ে নির্দিষ্ট স্থানে উপযুক্ত সংখ্যা লিখুন | বি, এস, এস নং<br>বি, এস, এস নং<br>বি, এস, এস নং<br>বি, এস, এস নং<br>বি, এস, এস নং                                                                   | 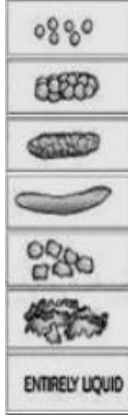 <p>1. পুরু পুঁজ পাত পাত, ঘনময়<br/>সব সময়ের বই হা</p> <p>2. পুঁজ বা কলমের মত ঘন<br/>বহু/নির্মিত</p> <p>3. পুঁজ বা কলমের মত ৩ টির<br/>কঠিন/কঠিন</p> <p>4. পুঁজ বা কঠিন/কঠিন, ঘন ৩<br/>নয়</p> <p>5. কঠিন/কঠিন মত পুঁজ<br/>সবচেয়ে হা</p> <p>6. ময়/ময় ময়/ময়<br/>পুঁজ</p> <p>7. একবারে ময়</p> <p>ENTIRELY LIQUID</p> |
| ৬৩। গত তিন মাসে কত ঘন ঘন মল ত্যাগের জন্য আপনাকে দৌড়ে টয়লেটে যেতে হয়েছিল?                                                                                                                                                                                                                                                                           | ০. কখনও নয় বা কদাচিৎ<br>১. মাঝে মাঝে<br>২. প্রায়ই<br>৩. বেশীর ভাগ সময়<br>৪. সব সময়                                                              |                                                                                                                                                                                                                                                                                                                                                                                                             |
| ক) এ রকম কখন হতো?                                                                                                                                                                                                                                                                                                                                     | ১. খাবারের পর<br>২. যখন পেট ভরা অনুভব হয়<br>৩. যখন আপনার উপরের পেটে ব্যাথা হয়<br>৪. যখন আপনি চিন্তিত বা চাপযুক্ত থাকেন                            |                                                                                                                                                                                                                                                                                                                                                                                                             |
| খ) এর তীব্রতা আপনি কিভাবে নির্ধারণ করেন?                                                                                                                                                                                                                                                                                                              | ১. অতি মৃদু<br>২. মৃদু<br>৩. মাঝারী<br>৪. তীব্র<br>৫. অতি তীব্র                                                                                     |                                                                                                                                                                                                                                                                                                                                                                                                             |
| ৬৪। আপনার ঘন ঘন তরল, গুটিগুটি বা জলের মত পায়খানা কি ৬ মাস আগে শুরু হয়েছিল?                                                                                                                                                                                                                                                                          | ০. না<br>১. হ্যাঁ                                                                                                                                   |                                                                                                                                                                                                                                                                                                                                                                                                             |
| ৬৫। গত তিন মাসে কত ঘন ঘন আপনার মলে পিচ্ছিল আম ছিল?                                                                                                                                                                                                                                                                                                    | ০. কখনও নয় বা কদাচিৎ<br>১. মাঝে মাঝে<br>২. প্রায়ই<br>৩. বেশীর ভাগ সময়<br>৪. সব সময়                                                              |                                                                                                                                                                                                                                                                                                                                                                                                             |
| ৬৬। গত তিন মাসে কত ঘন ঘন আপনার পেট ভরা বা ফোলা মনে হতো?<br><br>(ক) আপনার পেট ভরা বা পেট ফোলা ভাব কোথায় অনুভূত হয় পাশের চিত্রে নির্দেশ করুন। যদি আপনার একের অধিক স্থানে পেট ফোলা ভাব অনুভূত হয় তাহলে যেখানে সবচেয়ে তীব্র পেট ফোলা অনুভূত হয় সেই স্থানটি নির্দেশ করুন।                                                                             | ০. কখনও না → → →<br>১. মাসে এক দিনের কম<br>২. মাসে এক দিন<br>৩. মাসে দুই বা তিন দিন<br>৪. সপ্তাহে এক দিন<br>৫. সপ্তাহে এক দিনের বেশী<br>৬. প্রতিদিন | সরাসরি ৬৮ নং প্রশ্নে যান<br><br>                                                                                                                                                                                                                                                                                       |

|                                                                                                                                                                                                                                                                   |                                                                                                                                                                                             |                                                                                                                     |
|-------------------------------------------------------------------------------------------------------------------------------------------------------------------------------------------------------------------------------------------------------------------|---------------------------------------------------------------------------------------------------------------------------------------------------------------------------------------------|---------------------------------------------------------------------------------------------------------------------|
| <p>(খ) আপনার এই পেট ভরা বা পেট ফোলা ভাব কি মল ত্যাগ করার পর কমে যায় ?</p> <p>(গ) আপনার এই পেট ভরা বা পেট ফোলা ভাব কি বেশী অথবা কম বার পায়খানা হওয়ার সাথে সম্পর্কিত ?</p> <p>(ঘ) আপনার এই পেট ভরা বা পেট ফোলা ভাব কি শক্ত বা নরম পায়খানার সাথে সম্পর্কিত ?</p> | <p>(০) না<br/>(১) হ্যাঁ</p> <p>(০) না<br/>(১) হ্যাঁ</p> <p>(০) না<br/>(১) হ্যাঁ</p>                                                                                                         |                                                                                                                     |
| <p>৬৭। আপনার পেট ফোলা ফোলা উপসর্গ কি ছয় মাস আগে থেকে শুরু হয়েছিল?</p>                                                                                                                                                                                           | <p>০. না<br/>১. হ্যাঁ</p>                                                                                                                                                                   |                                                                                                                     |
| <p>৬৮। গত ছয় মাসে কত ঘন ঘন আপনি পেটের মাঝখানে অথবা ডানদিকে একটি স্থায়ী ব্যাথা অনুভব করেছেন? (ডান পাশের চিত্রে নির্দেশ করুন)</p>                                                                                                                                 | <p>০. কখনও না/কদাচিৎ → → → →</p> <p>১. মাসে এক দিনের কম</p> <p>২. মাসে এক দিন</p> <p>৩. মাসে দুই বা তিন দিন</p> <p>৪. সপ্তাহে এক দিন</p> <p>৫. সপ্তাহে এক দিনের বেশী</p> <p>৬. প্রতিদিন</p> | <p>সরাসরি ৭৫ নং প্রশ্নে যান</p> 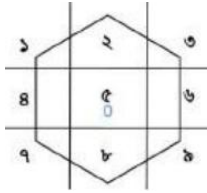 |
| <p>৬৯। এই ব্যাথা কি ৩০ মিনিট বা তার অধিক সময় স্থায়ী হয়?</p>                                                                                                                                                                                                    | <p>০. কখনও না বা কদাচিৎ</p> <p>১. মাঝে মাঝে</p> <p>২. প্রায়ই</p> <p>৩. বেশীর ভাগ সময়</p> <p>৪. সব সময়</p>                                                                                |                                                                                                                     |
| <p>৭০। এই ব্যাথা কি ধীরে ধীরে বেড়ে স্থায়ী তীব্র আকার ধারণ করত?</p>                                                                                                                                                                                              | <p>০. কখনও না বা কদাচিৎ</p> <p>১. মাঝে মাঝে</p> <p>২. প্রায়ই</p> <p>৩. বেশীর ভাগ সময়</p> <p>৪. সব সময়</p>                                                                                |                                                                                                                     |
| <p>৭১। ব্যাথার আক্রান্ত হওয়ার মাঝের সময়ে কি তা পুরোপুরি সেরে যেত?</p>                                                                                                                                                                                           | <p>০. কখনও না বা কদাচিৎ</p> <p>১. মাঝে মাঝে</p> <p>২. প্রায়ই</p> <p>৩. বেশীর ভাগ সময়</p> <p>৪. সব সময়</p>                                                                                |                                                                                                                     |
| <p>৭২। এই ব্যাথার কারণে কি আপনার দৈনন্দিন কর্মকান্ড ব্যাহত হয়েছে অথবা আপনি জরুরী ভাবে চিকিৎসক বা জরুরী বিভাগে যেতে বাধ্য হয়েছেন?</p>                                                                                                                            | <p>০. কখনও না বা কদাচিৎ</p> <p>১. মাঝে মাঝে</p> <p>২. প্রায়ই</p> <p>৩. বেশীর ভাগ সময়</p> <p>৪. সব সময়</p>                                                                                |                                                                                                                     |
| <p>৭৩। আপনার পিছুথলি কি অপসারণ করা হয়েছে?</p>                                                                                                                                                                                                                    | <p>০. না → → → →</p> <p>১. হ্যাঁ</p>                                                                                                                                                        | <p>সরাসরি ৭৫ নং প্রশ্নে যান</p>                                                                                     |
| <p>৭৪। আপনার পিছুথলি অপসারণের পর কত ঘন ঘন আপনি এ ব্যাথা অনুভব করেছেন?</p>                                                                                                                                                                                         | <p>০. কখনও না বা কদাচিৎ</p> <p>১. মাঝে মাঝে</p> <p>২. প্রায়ই</p> <p>৩. বেশীর ভাগ সময়</p> <p>৪. সব সময়</p>                                                                                |                                                                                                                     |
| <p>৭৫। আপনি কি পেট ফাঁপাতে ভোগেন?</p>                                                                                                                                                                                                                             | <p>০. কখনও না বা কদাচিৎ</p> <p>১. মাঝে মাঝে</p> <p>২. প্রায়ই</p> <p>৩. বেশীর ভাগ সময়</p> <p>৪. সব সময়</p>                                                                                |                                                                                                                     |

|                                                                                                         |                                                                                                                                                          |                          |
|---------------------------------------------------------------------------------------------------------|----------------------------------------------------------------------------------------------------------------------------------------------------------|--------------------------|
| ৭৬। আপনার কি ক্রমাগত বায়ু নিঃসরণের সমস্যা হয়?                                                         | ০. কখনও না বা কদাচিৎ<br>১. মাঝে মাঝে<br>২. প্রায়ই<br>৩. বেশীর ভাগ সময়<br>৪. সব সময়                                                                    |                          |
| ৭৭। গত তিন মাসে কত ঘন ঘন আপনি আকস্মিকভাবে তরল বা শক্ত মল নির্গত করেছেন?                                 | ০. কখনও না/কদাচিৎ→→→→<br>১. মাসে এক দিনের কম<br>২. মাসে এক দিন<br>৩. মাসে দুই বা তিন দিন<br>৪. সপ্তাহে এক দিন<br>৫. সপ্তাহে এক দিনের বেশী<br>৬. প্রতিদিন | সরাসরি ৮০ নং প্রশ্নে যান |
| ৭৮। গত তিন মাসে যখন আকস্মিক ভাবে তরল বা শক্ত মল নির্গত হয়েছিল, এর পরিমাণ কতটুকু ছিল?                   | ১. অল্প পরিমাণ (শুধু কাপড়ে দাগ)<br>২. মাঝারী পরিমাণ (কাপড়ে দাগ থেকে বেশী কিন্তু পূর্ণ মলত্যাগ নয়)<br>৩. অনেক পরিমাণ (পূর্ণ মলত্যাগ)                   |                          |
| ৭৯। গত বছরে যখন এই আকস্মিক মল নির্গত হয়েছিল, তা কিরূপ ছিল?                                             | ১. শুধু তরল/ আম<br>২. শুধু মল<br>৩. তরল/আম এবং মল উভয়ই                                                                                                  |                          |
| ৮০। গত তিন মাসে কত ঘন ঘন আপনি মলদ্বার বা মলাশয়ে ব্যথা বা চাপ অনুভব করেছেন যখন আপনি মলত্যাগ করছিলেন না? | ০. কখনও না/কদাচিৎ→→→→<br>১. মাসে এক দিনের কম<br>২. মাসে এক দিন<br>৩. মাসে দুই বা তিন দিন<br>৪. সপ্তাহে এক দিন<br>৫. সপ্তাহে এক দিনের বেশী<br>৬. প্রতিদিন | সরাসরি ৮৪ নং প্রশ্নে যান |
| ৮১। এই যন্ত্রনা, ব্যথা বা চাপ কতক্ষণ থাকত?                                                              | ১. কয়েক সেকেন্ড থেকে ২০ মিনিট পর্যন্ত এবং পুরোপুরি সেরে যায়<br>২. ২০ মিনিটের বেশী সময় থেকে কয়েকদিন বা আরও বেশী সময়                                  |                          |
| ৮২। আপনার মলদ্বার বা মলাশয়ে ব্যথা হলে তা কি একই দিনে পুরোপুরি সেরে যেত?                                | ০. না<br>১. হ্যাঁ                                                                                                                                        |                          |
| ৮৩। মলদ্বার বা মলাশয়ের যন্ত্রনা, ব্যথা বা চাপ কি ৬ মাসের আগে শুরু হয়েছিল?                             | ০. না<br>১. হ্যাঁ                                                                                                                                        |                          |
| ৮৪। গত তিন মাসে কত ঘন ঘন আপনার গলার স্বর ভেঙ্গে গিয়েছিল বা গলার স্বরের অবনতি হয়েছিল?                  | ০. কখনও না বা কদাচিৎ<br>১. মাঝে মাঝে<br>২. প্রায়ই<br>৩. বেশীর ভাগ সময়<br>৪. সব সময়                                                                    |                          |
| ৮৫। গত তিন মাসে কত ঘন ঘন আপনি একনাগাড়ে বা ক্রমাবনতিমূলক ভাবে ঘাড়ে বা গলায় ব্যথা অনুভব করেছিলেন?      | ০. কখনও কখনও বা কদাচিৎ<br>১. মাঝে মাঝে<br>২. প্রায়ই<br>৩. বেশীর ভাগ সময়<br>৪. সব সময়                                                                  |                          |
| ৮৬। গত তিন মাসে কত ঘন ঘন আপনি পরিশ্রমের কারণে বা হৃদরোগ সংক্রান্ত বুকে ব্যথা অনুভব করেছেন?              | ০. কখনও না বা কদাচিৎ<br>১. মাঝে মাঝে<br>২. প্রায়ই                                                                                                       |                          |

|                                                                                                      |                                                                                                                                                                                                                                                                                 |  |
|------------------------------------------------------------------------------------------------------|---------------------------------------------------------------------------------------------------------------------------------------------------------------------------------------------------------------------------------------------------------------------------------|--|
|                                                                                                      | <p>৩. বেশীর ভাগ সময়</p> <p>৪. সব সময়</p>                                                                                                                                                                                                                                      |  |
| <p>৮৭। গত তিন মাসে কত ঘন ঘন আপনার গিলতে অসুবিধা হয়েছিল?</p>                                         | <p>০. কখনও না বা কদাচিৎ</p> <p>১. মাঝে মাঝে</p> <p>২. প্রায়ই</p> <p>৩. বেশীর ভাগ সময়</p> <p>৪. সব সময়</p>                                                                                                                                                                    |  |
| <p>৮৮। আপনি কি আপনার সবচাইতে অস্বস্থি কর উপসর্গের জন্য ডাক্তারের পূর্বের পরামর্শ নিয়ে সম্ভ্রষ্ট</p> | <p>১.হ্যাঁ</p> <p>২.না, কারণ চিকিৎসক আমার সমস্যাকে গুরুত্ব দেননি</p> <p>৩.না, কারণ চিকিৎসক আমাকে যথেষ্ট ব্যাখ্যা দেননি</p> <p>৪.না, কারণ চিকিৎসক যথেষ্ট পরীক্ষা- নিরীক্ষা করেননি</p> <p>৫.আমি এই সমস্যা নিয়ে চিকিৎসকের নিকট যাইনি</p> <p>৬.না, কারণ চিকিৎসা কার্যকরী ছিলনা</p> |  |
